# Supplementary material
Source: Springer Nature journal article supplement (https://www.springermedizin.de/resource/supplementary/12889_2006_445_MOESM1_ESM.pdf/9500890)

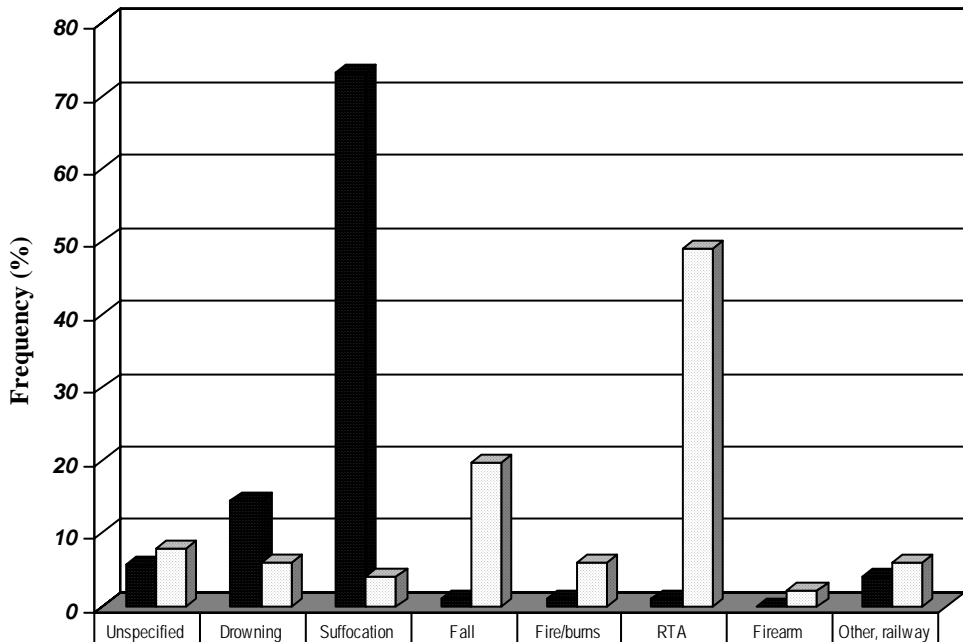

|                          |     |      |      |      |     |     |   |     |
|--------------------------|-----|------|------|------|-----|-----|---|-----|
| ■ Intentional (N = 90)   | 5.6 | 14.4 | 73.3 | 1.1  | 1.1 | 1.1 | 0 | 4.1 |
| □ Unintentional (N = 51) | 7.8 | 5.9  | 3.9  | 19.6 | 5.9 | 49  | 2 | 5.9 |

Supplement: MOESM1 [file 9500890]
